# Supplementary material
Source: Springer Nature journal article supplement (https://www.springermedizin.de/resource/supplementary/12885_2010_2699_MOESM1_ESM.pdf/9461778)

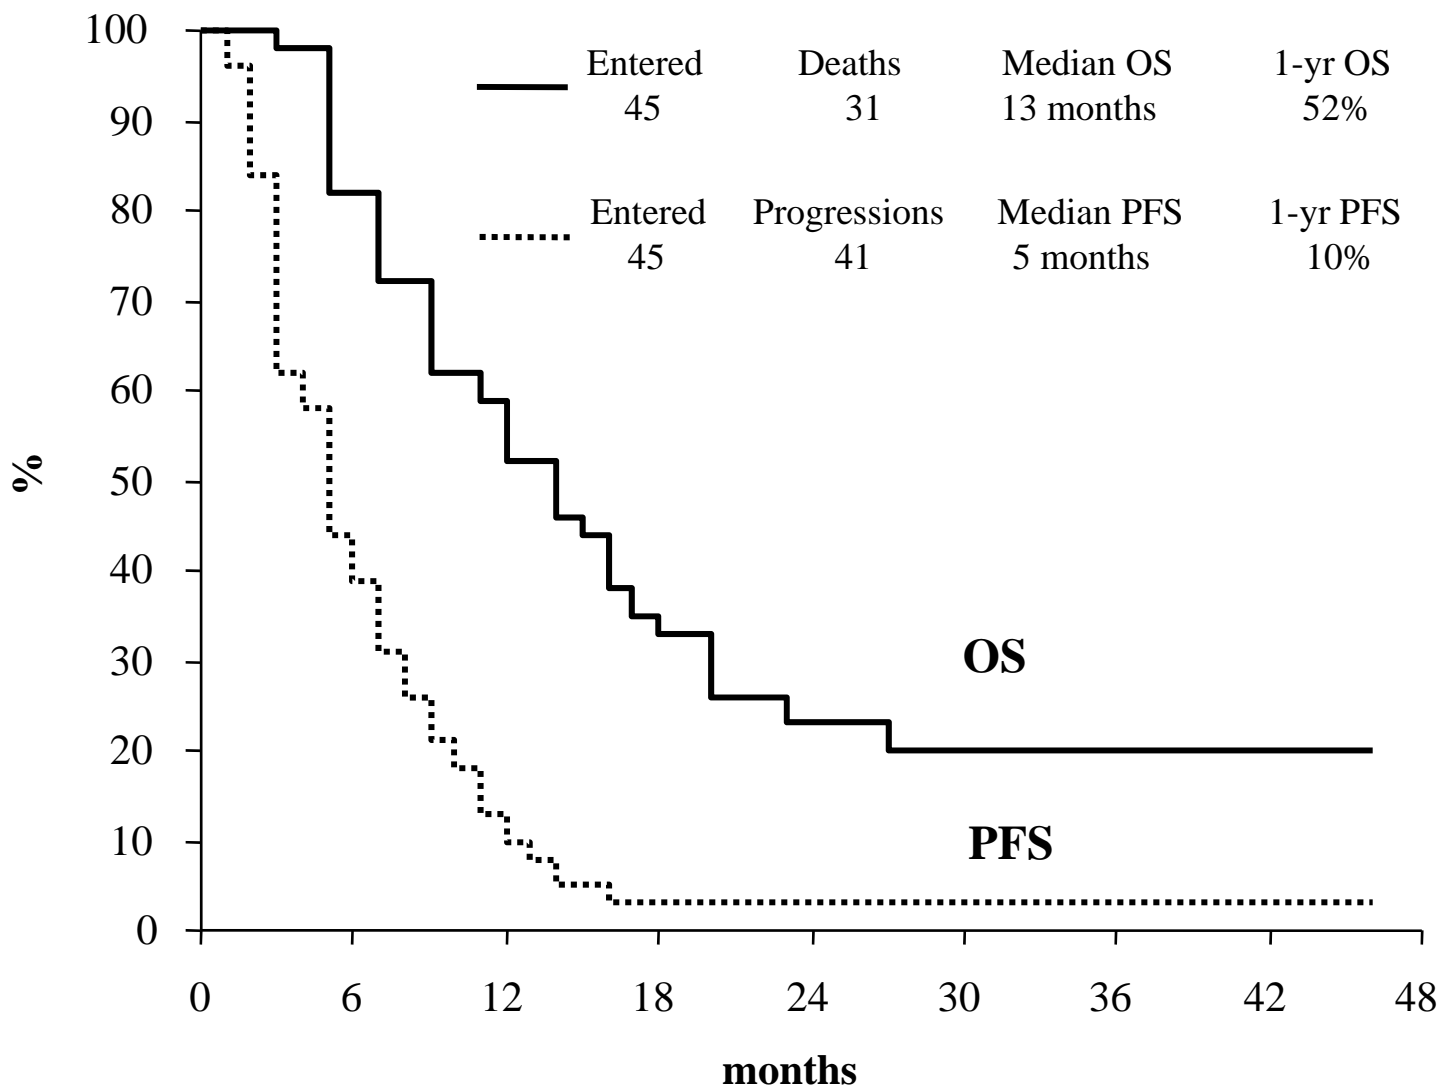

No. of patients at risk

|             |    |    |    |    |    |
|-------------|----|----|----|----|----|
| Progression | 18 | 7  | 4  |    |    |
| Death       | 37 | 25 | 18 | 15 | 14 |

Supplement: MOESM1 [file 9461778]
